# Supplementary material for: Photocatalysis in an evanescent field: an in situ approach to studying photocatalytic performance by tracing interfacial refractive index changes and kinetics
Source: Royal Society of Chemistry journal article supplement (doi:10.1039/c8ta08705a), 2018-01-01
Supplement: c8ta08705a1.pdf [file c8ta08705a1.pdf]

## Supporting Information

Photocatalysis in evanescent field: an in-situ approach to studying photocatalytic performance by tracing interfacial refractive index changes and kinetics

Yunyun Huang, Aoxiang Xiao, Guanhua Hou, Hongtao Li, Tuan Guo, Bai-Ou Guan\*

Guangdong Provincial Key Laboratory of Optical Fiber Sensing and Communications, Institute of Photonics Technology, Jinan University, Guangzhou 510632, China

\* Corresponding authors: B.-O. Guan.

E-mail address: tguanbo@jnu.edu.cn

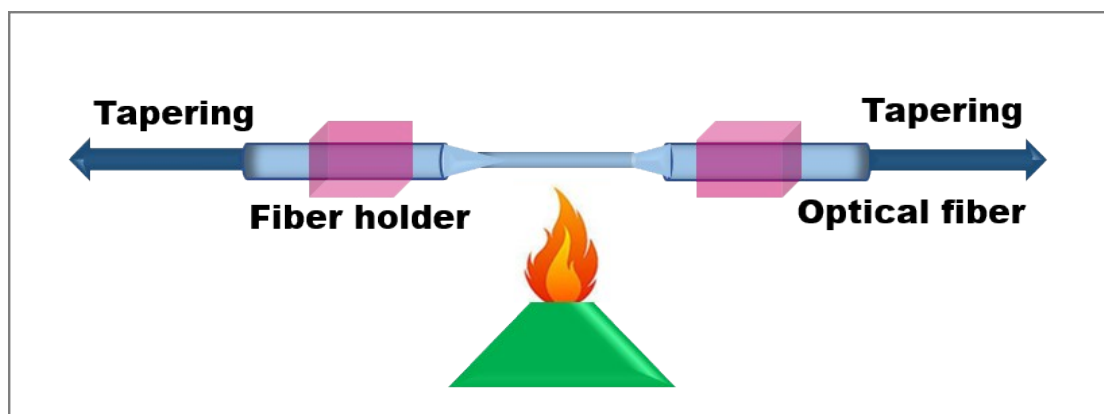

**Fig. S1.** Schematic illustration of silica optical microfiber fabrication.

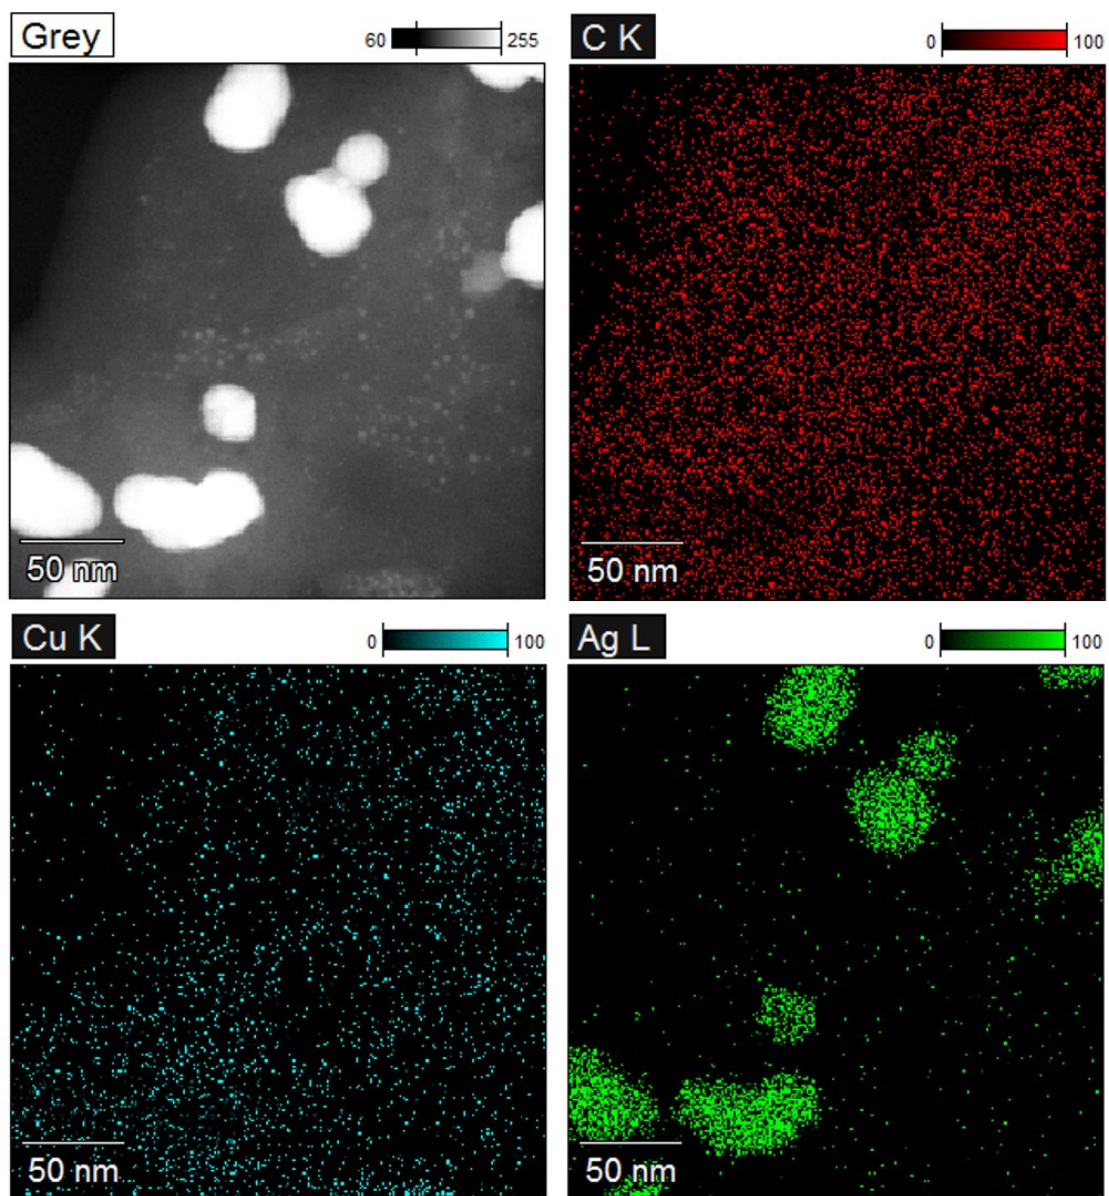

Fig. S2. SEM-EDS elemental mapping of  $\text{Cu}_2\text{O-Ag@rGO}$  (the corresponding elemental mappings of C, Cu and Ag).

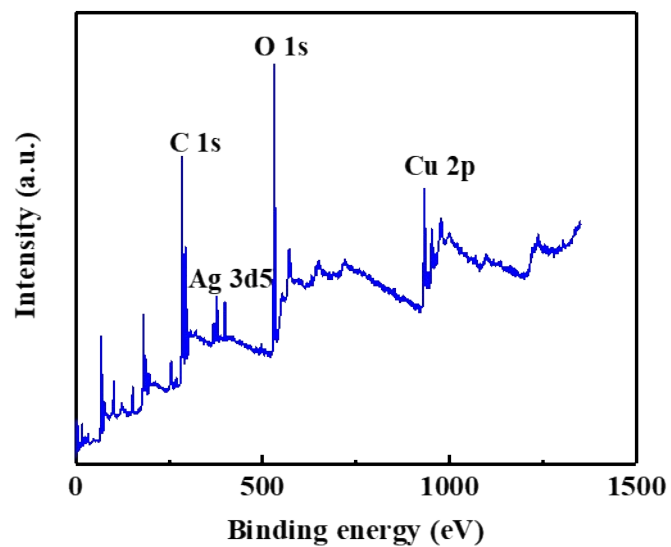

Fig. S3. XPS survey spectra of the  $\text{Cu}_2\text{O-Ag@rGO}$  composite.

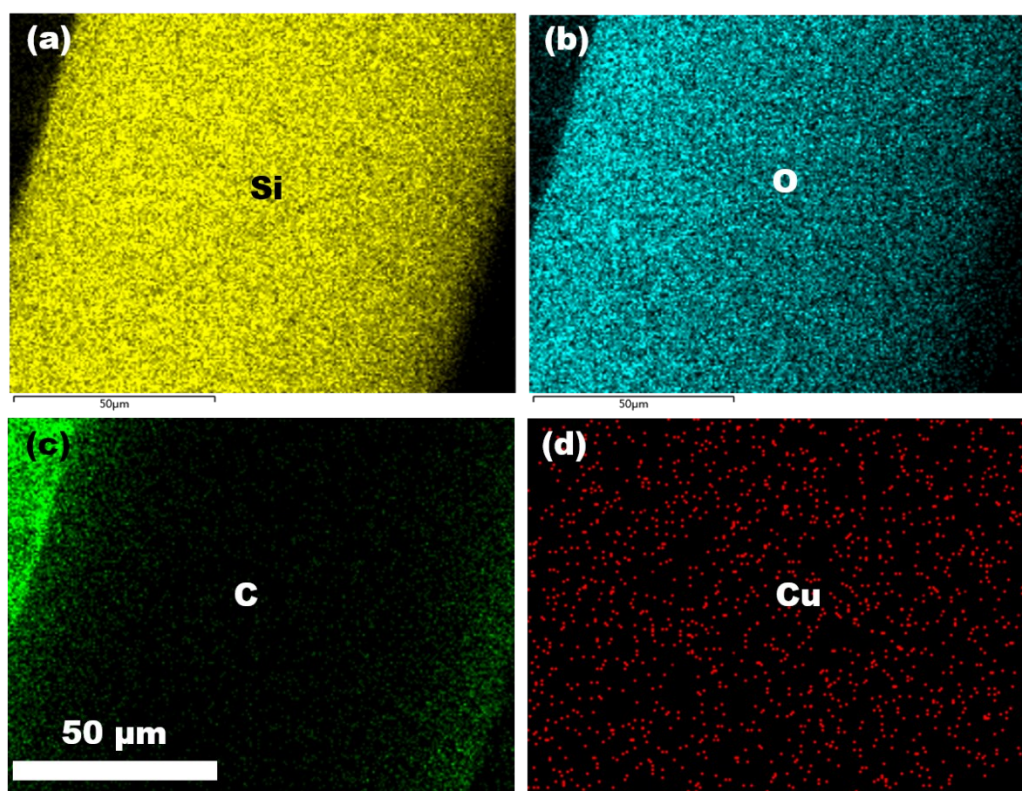

Fig. S4. EDX mapping images of (a) Si, (b) O, (c) C and (d) Cu elements on the microfiber with  $\text{Cu}_2\text{O@rGO}$  nanocomposites. (For the resolution limitation of the detector, a single-mode fiber with diameter of  $125\ \mu\text{m}$  was chosen to replace the microfiber, with modification process kept in the same.)



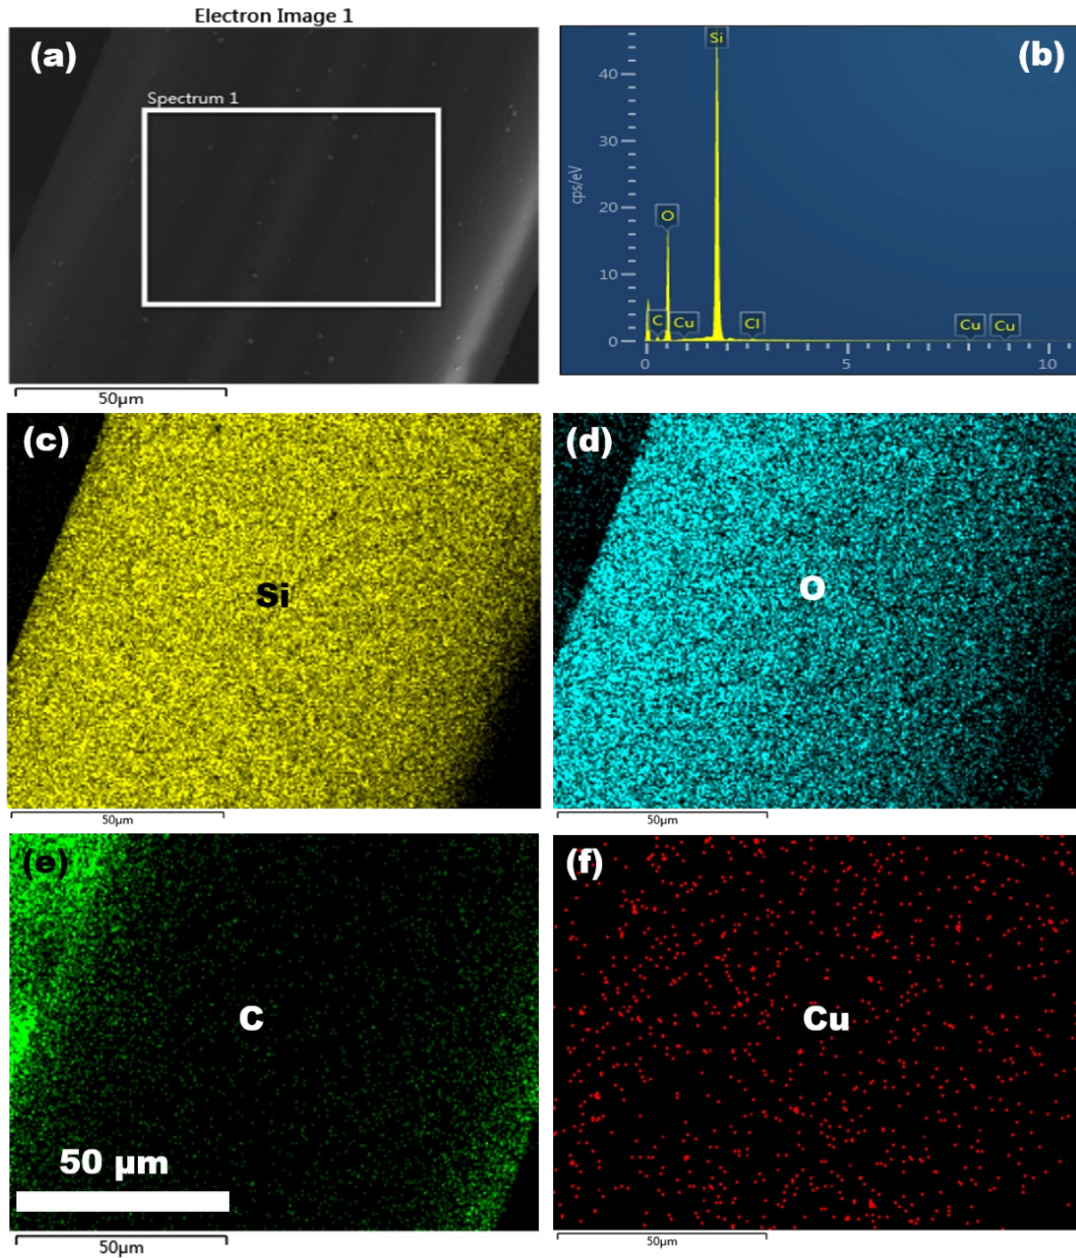

**Fig. S5.** (a) SEM image and (b) EDX spectrum, and EDX mapping images of (c) Si, (d) O, (e) C and (f) Cu elements on the microfiber with  $\text{Cu}_2\text{O}$  nanocomposites. (For the resolution limitation of the detector, a single-mode fiber with diameter of 125  $\mu\text{m}$  was chosen to replace the microfiber, with modification process kept in the same.)

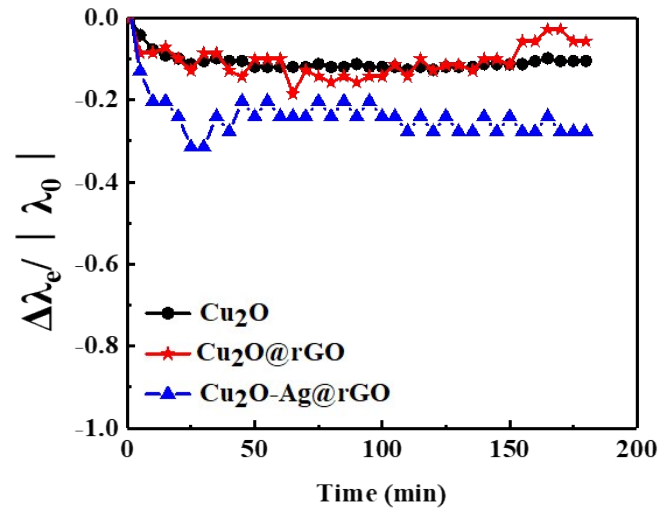

**Fig. S6.** Optical wavelength shift recorded by the microfiber functionalized by photocatalysts under visible-light irradiation and without phenol solution.
